# Supplementary material for: Investigation into the Adsorption of Methylene Blue and Methyl Orange by UiO-66-NO2 Nanoparticles
Source: Hindawi journal article supplement (doi:10.1155/2021/5512174), 2021-06-12
Supplement: f1 [file 5512174.f1.zip]

**Supporting information**

**Investigation into the adsorption of methylene blue and methyl orange by  
UiO-66-NO<sub>2</sub> nanoparticles**

Hien Thi Dinh, Nam Trung Tran, Dai Xuan Trinh\*

Faculty of Chemistry, VNU University of Science, Vietnam National University,  
Hanoi, Vietnam

*19 Le Thanh Tong str., Hoan Kiem Distr., Hanoi, Vietnam*

**Corresponding author:**

**Dr. Dai Xuan Trinh**

Email: [daitx@vnu.edu.vn](mailto:daitx@vnu.edu.vn)

Telephone: +84 978 999 977

## TEM images of UiO-66-NO<sub>2</sub> nanoparticles

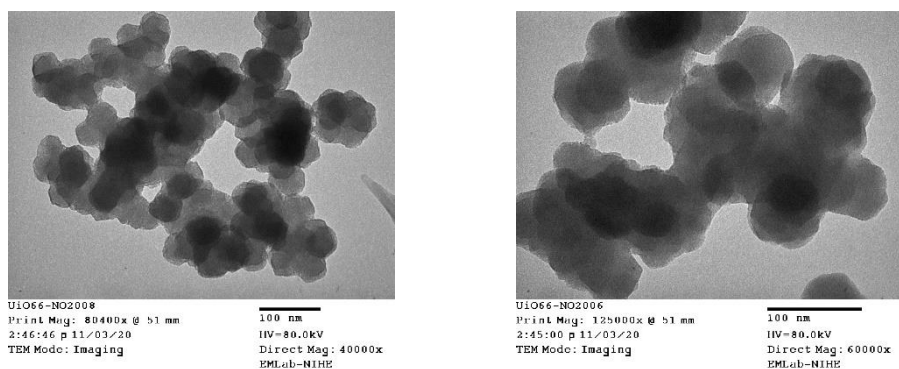

**Figure S. 1.** TEM image of UiO-66-NO<sub>2</sub>

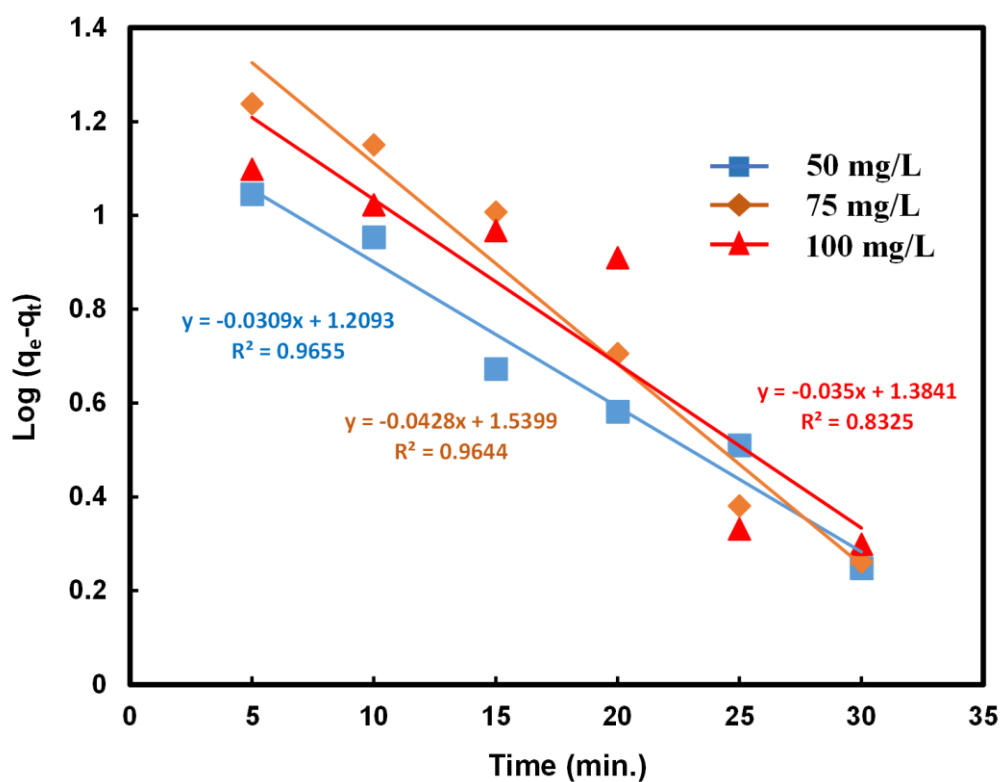

**Figure S. 2.** Pseudo first order kinetic model of MB adsorption on UiO-66-NO<sub>2</sub>

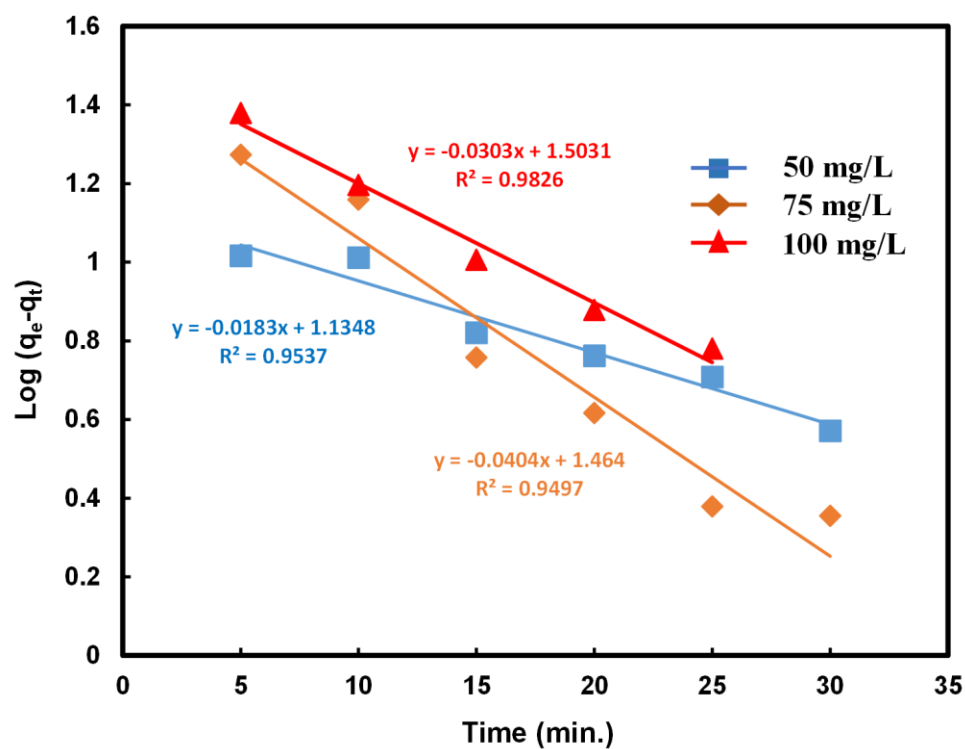

**Figure S. 3.** Pseudo first order kinetic model of MO adsorption on UiO-66-NO<sub>2</sub>

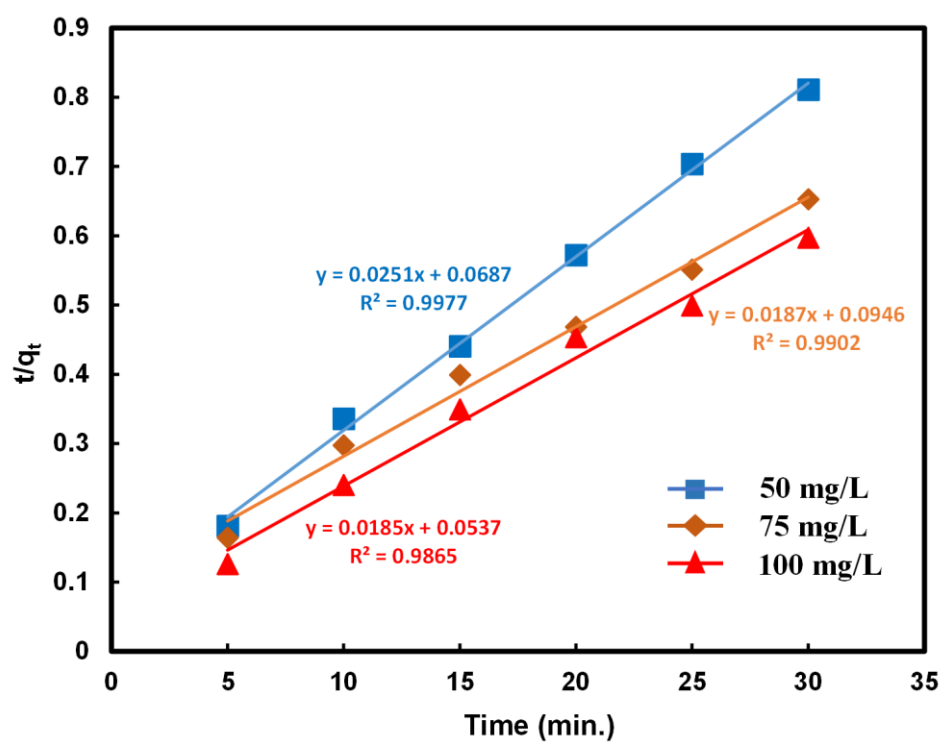

**Figure S. 4.** Pseudo second order kinetic model of MB adsorption on UiO-66-NO<sub>2</sub>

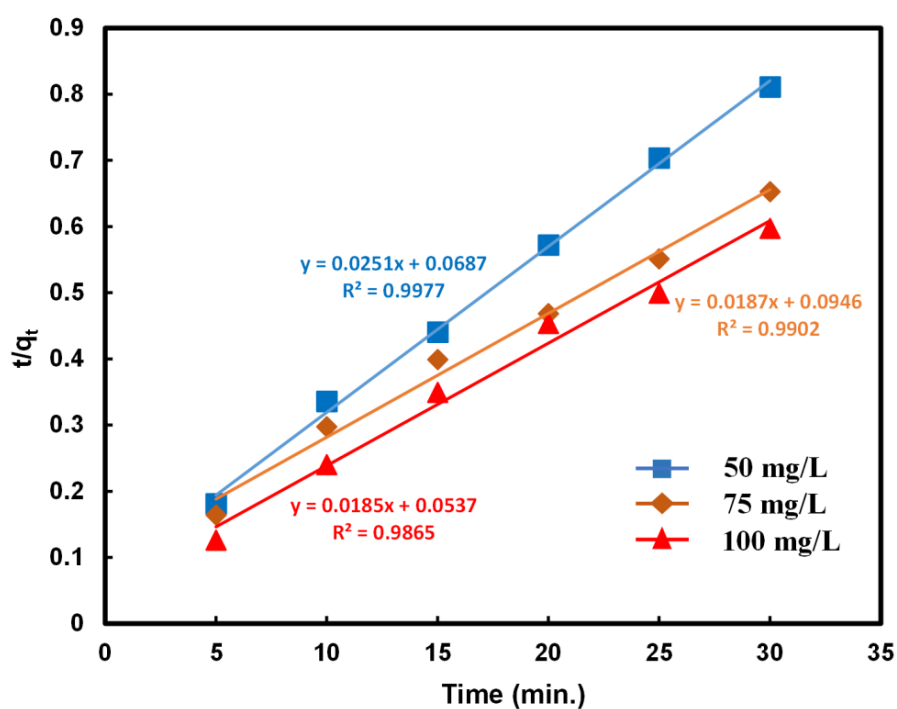

**Figure S. 5.** Pseudo second order kinetic model of MO adsorption on UiO-66-NO<sub>2</sub>

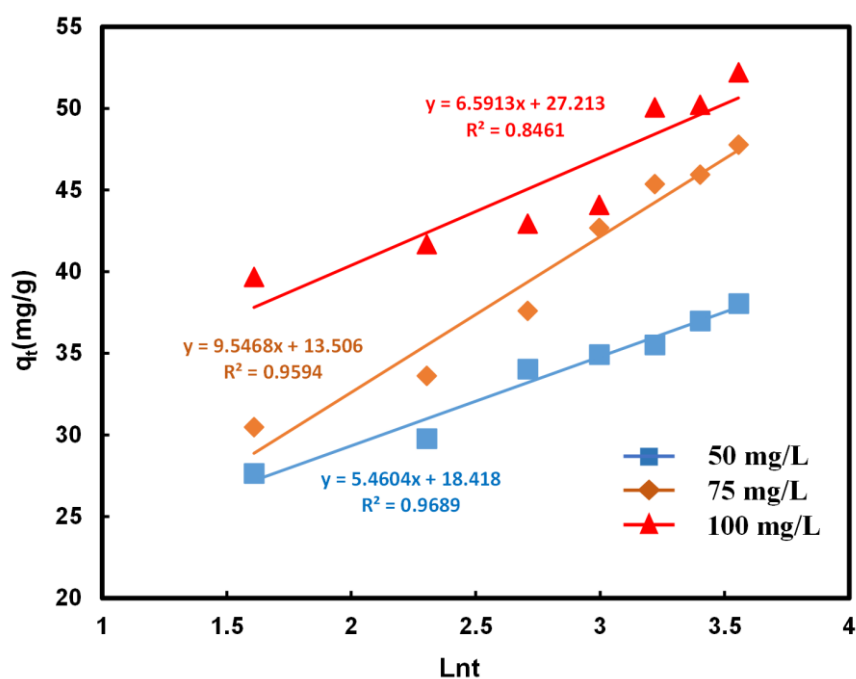

**Figure S. 6.** Elovich adsorption model of MB adsorption on UiO-66-NO<sub>2</sub> anoparticles

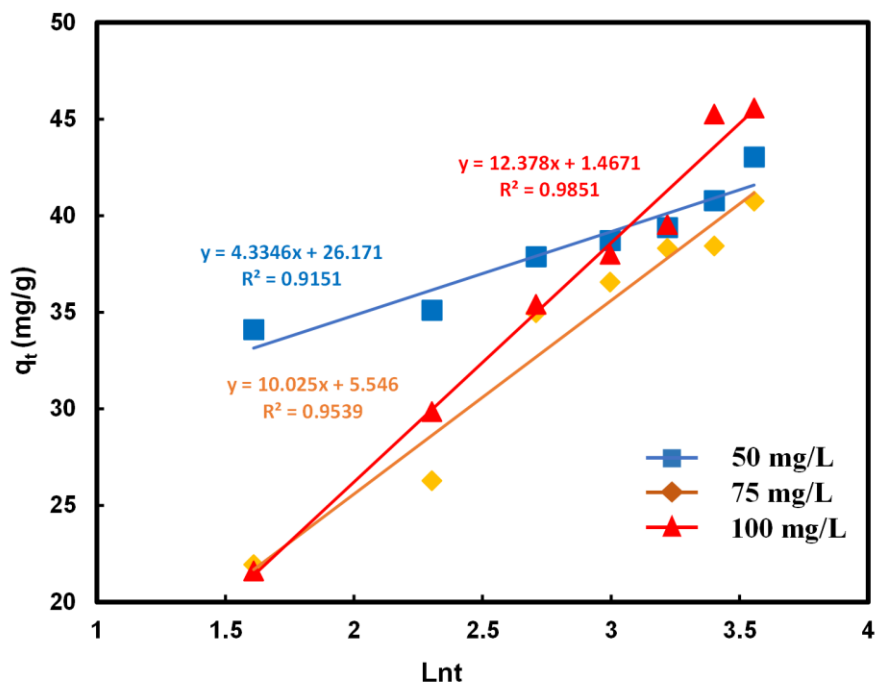

**Figure S. 7.** Elovich adsorption model of MO adsorption on UiO-66-NO<sub>2</sub> anoparticles

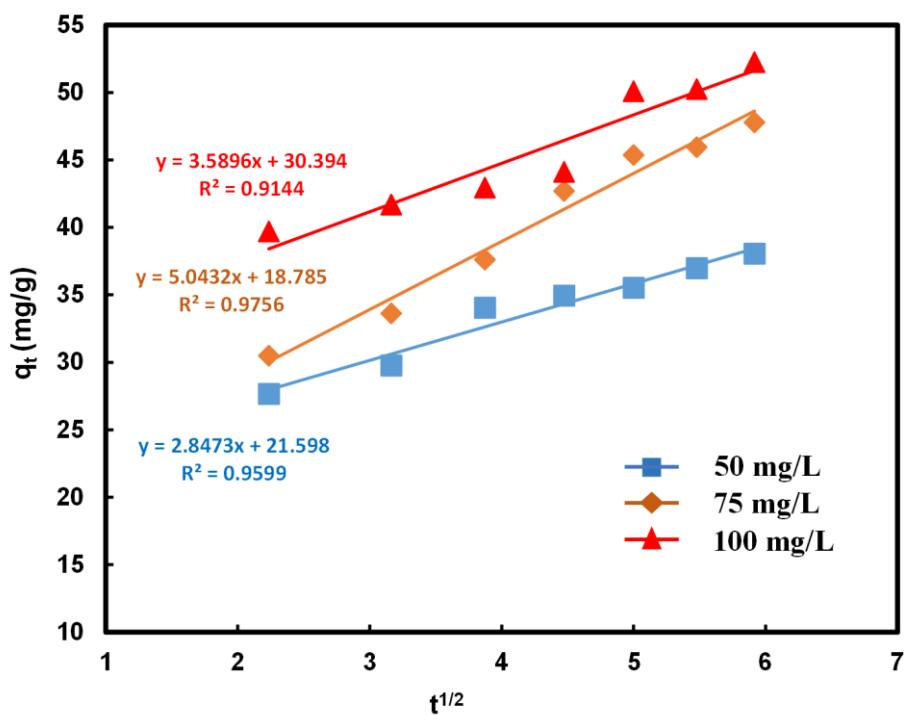

**Figure S. 8.** Intraparticle adsorption model of MB adsorption on UiO-66-NO<sub>2</sub>

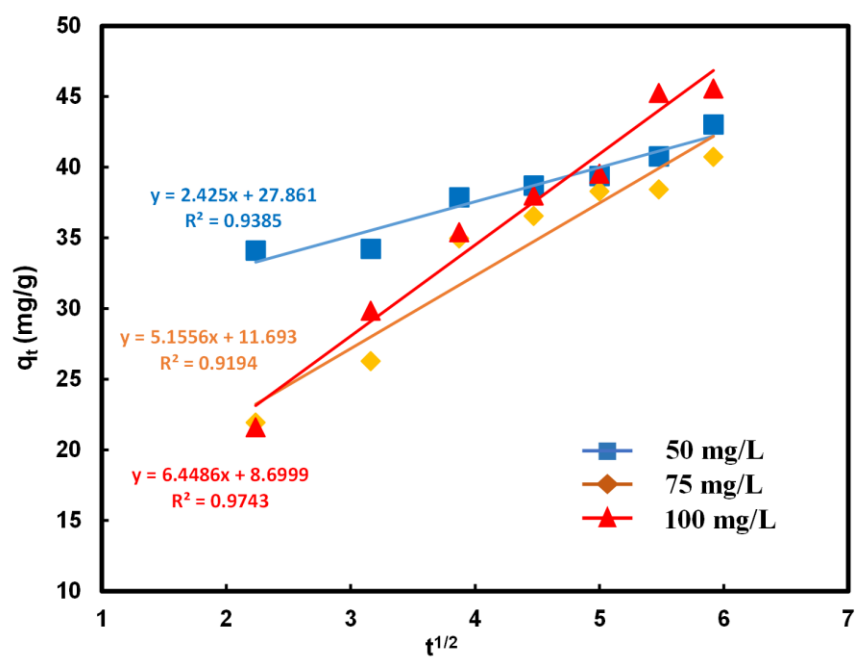

**Figure S. 9.** Intraparticle adsorption model of MO adsorption on UiO-66-NO<sub>2</sub>
