# Supplementary material for: Investigation into the Adsorption of Methylene Blue and Methyl Orange by UiO-66-NO2 Nanoparticles
Source: J Anal Methods Chem. 2021 Jun 12;2021:5512174. doi: 10.1155/2021/5512174 (PMC8216806; doi:10.1155/2021/5512174)
Supplement: Supplementary Materials — Figure S1: TEM image of UiO-66-NO2. Figure S2: pseudo-first-order kinetic model of MB adsorption onto UiO-66-NO2. Figure S3: pseudo-first-order kinetic model of MO adsorption onto UiO-66-NO2. Figure S4: pseudo-second-order kinetic model of MB adsorption onto UiO-66-NO2. Figure S5: pseudo-second-order kinetic model of MO adsorption onto UiO-66-NO2. Figure S6: Elovich adsorption model of MB adsorption onto UiO-66-NO2 nanoparticles. Figure S7: Elovich adsorption model of MO adsorption onto UiO-66-NO2 nanoparticles. Figure S8: intraparticle adsorption model of MB adsorption onto UiO-66-NO2. Figure S9: intraparticle adsorption model of MO adsorption onto UiO-66-NO2. [file 5512174.f1.zip]

Archive with 2 entries (2 files):
- 5512174.f1/supporting information.docx
- 5512174.f1/supporting information.pdf
